# Supplementary figures and images for: Tumor-derived CSF-1 induces the NKG2D ligand RAE-1δ on tumor-infiltrating macrophages
Source: eLife journal article supplement (doi:10.7554/elife.32919), 2018-05-14

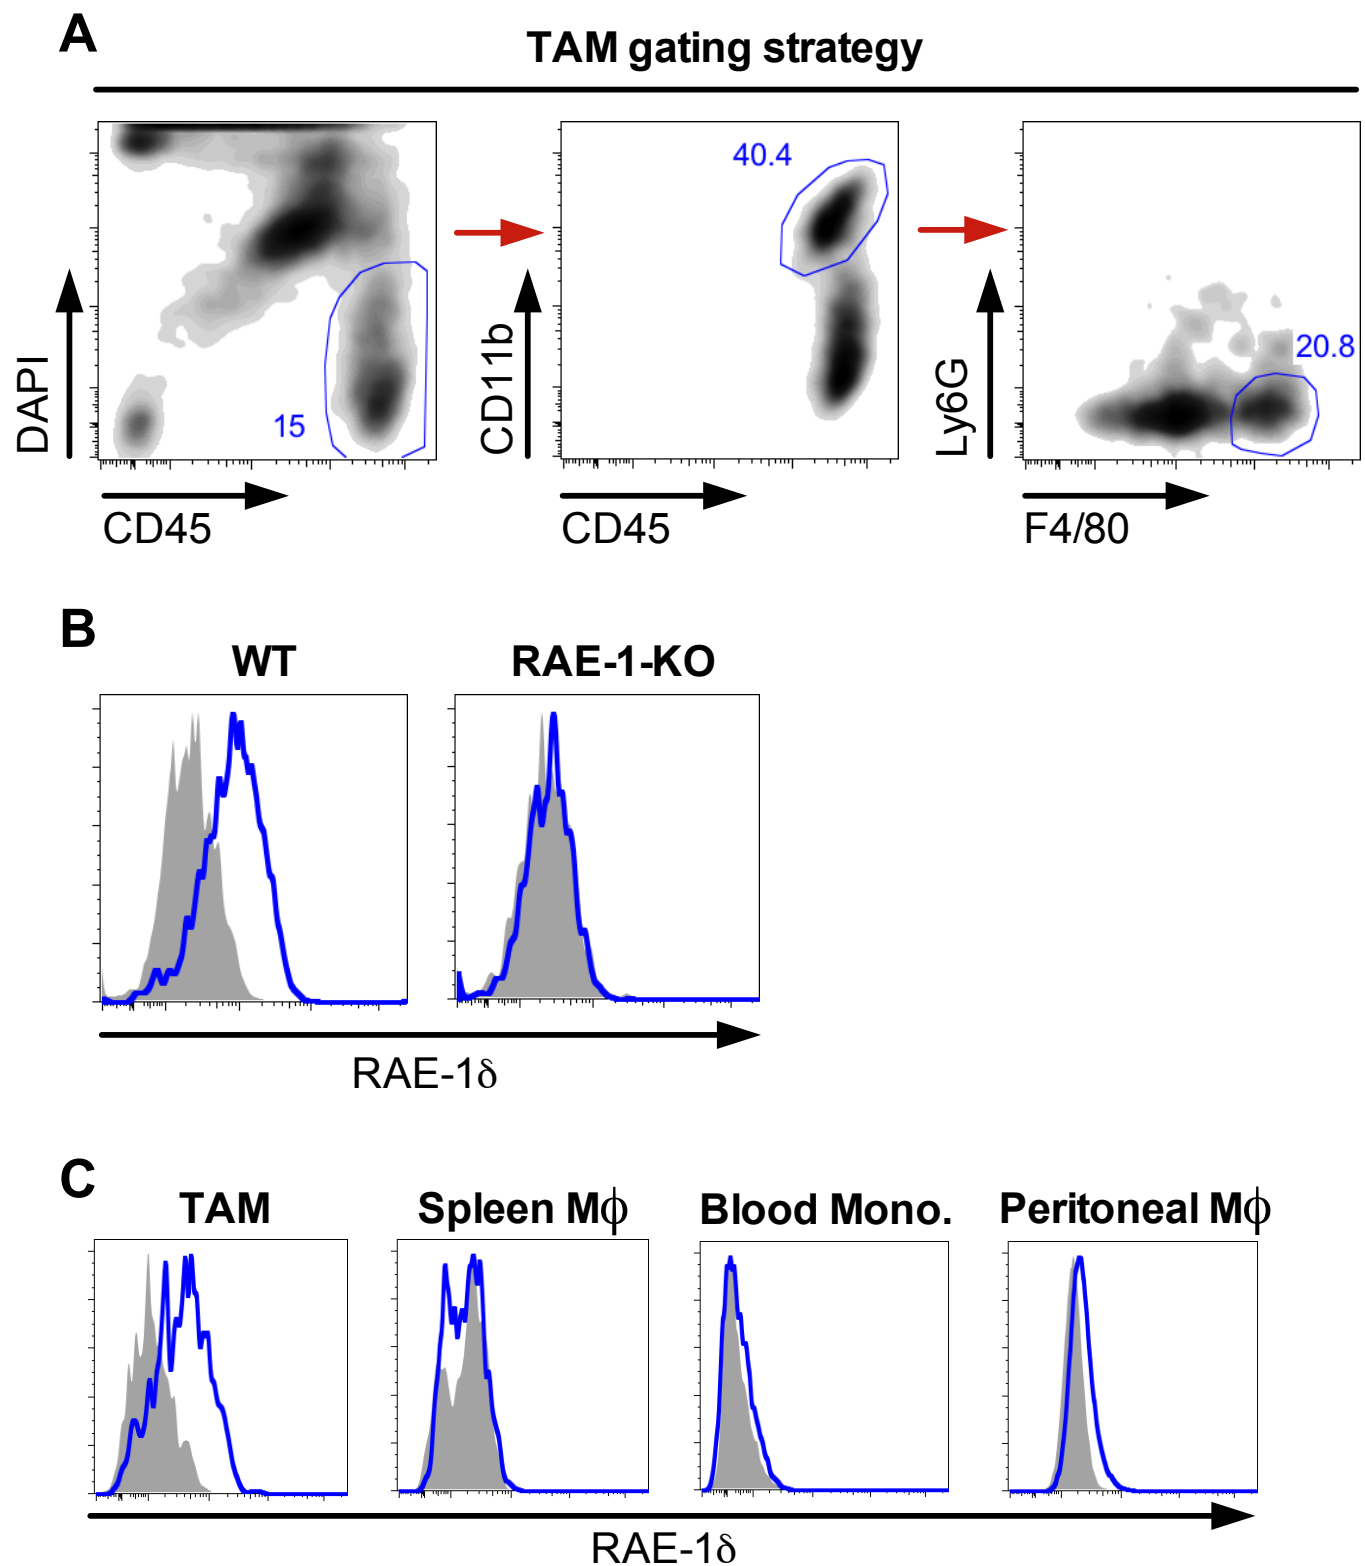

**Fig. 1 - Fig. Supplement 1**

Supplement: supp [file elife-32919-supp-v1.zip]

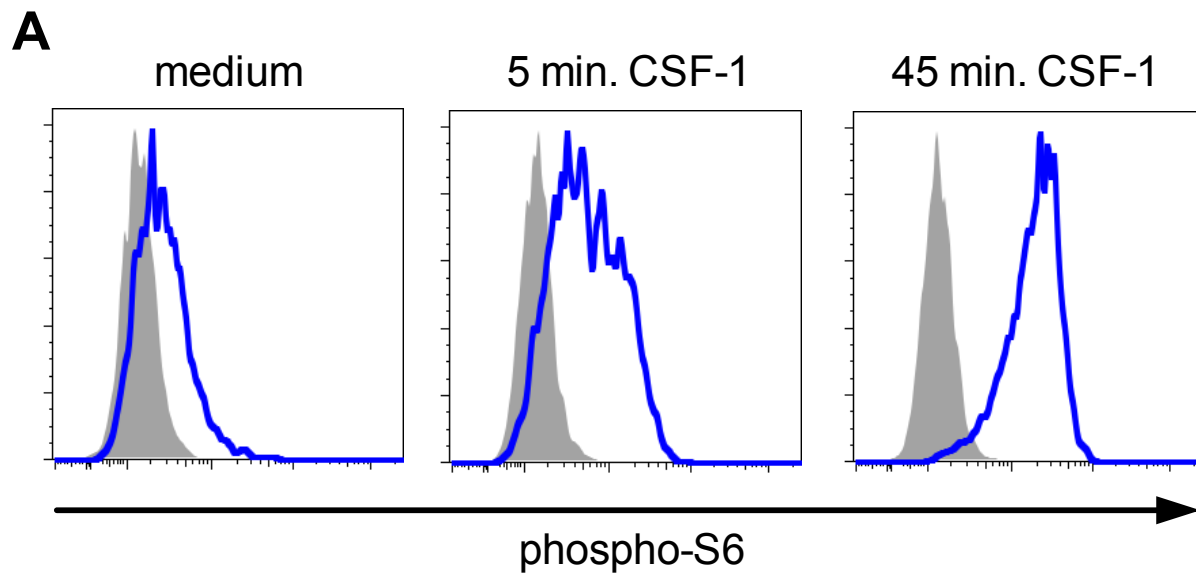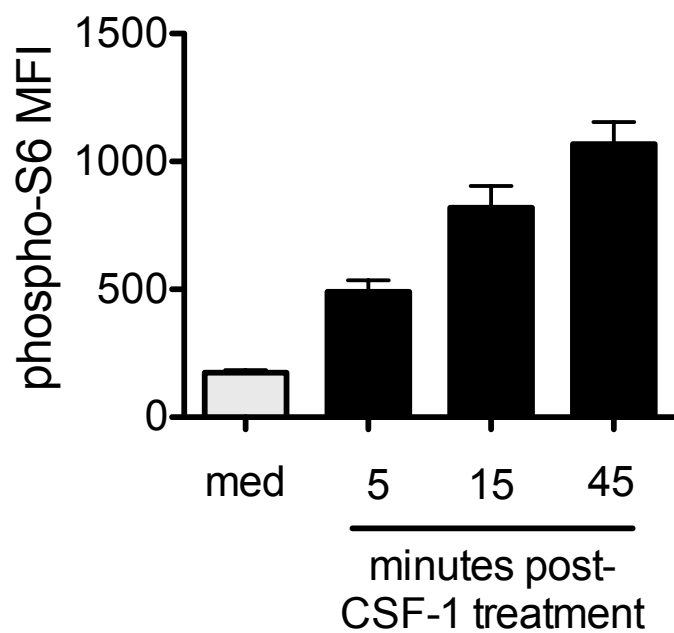

**Fig. 6 - Fig. Supplement 1**

Supplement: supp [file elife-32919-supp-v1.zip]

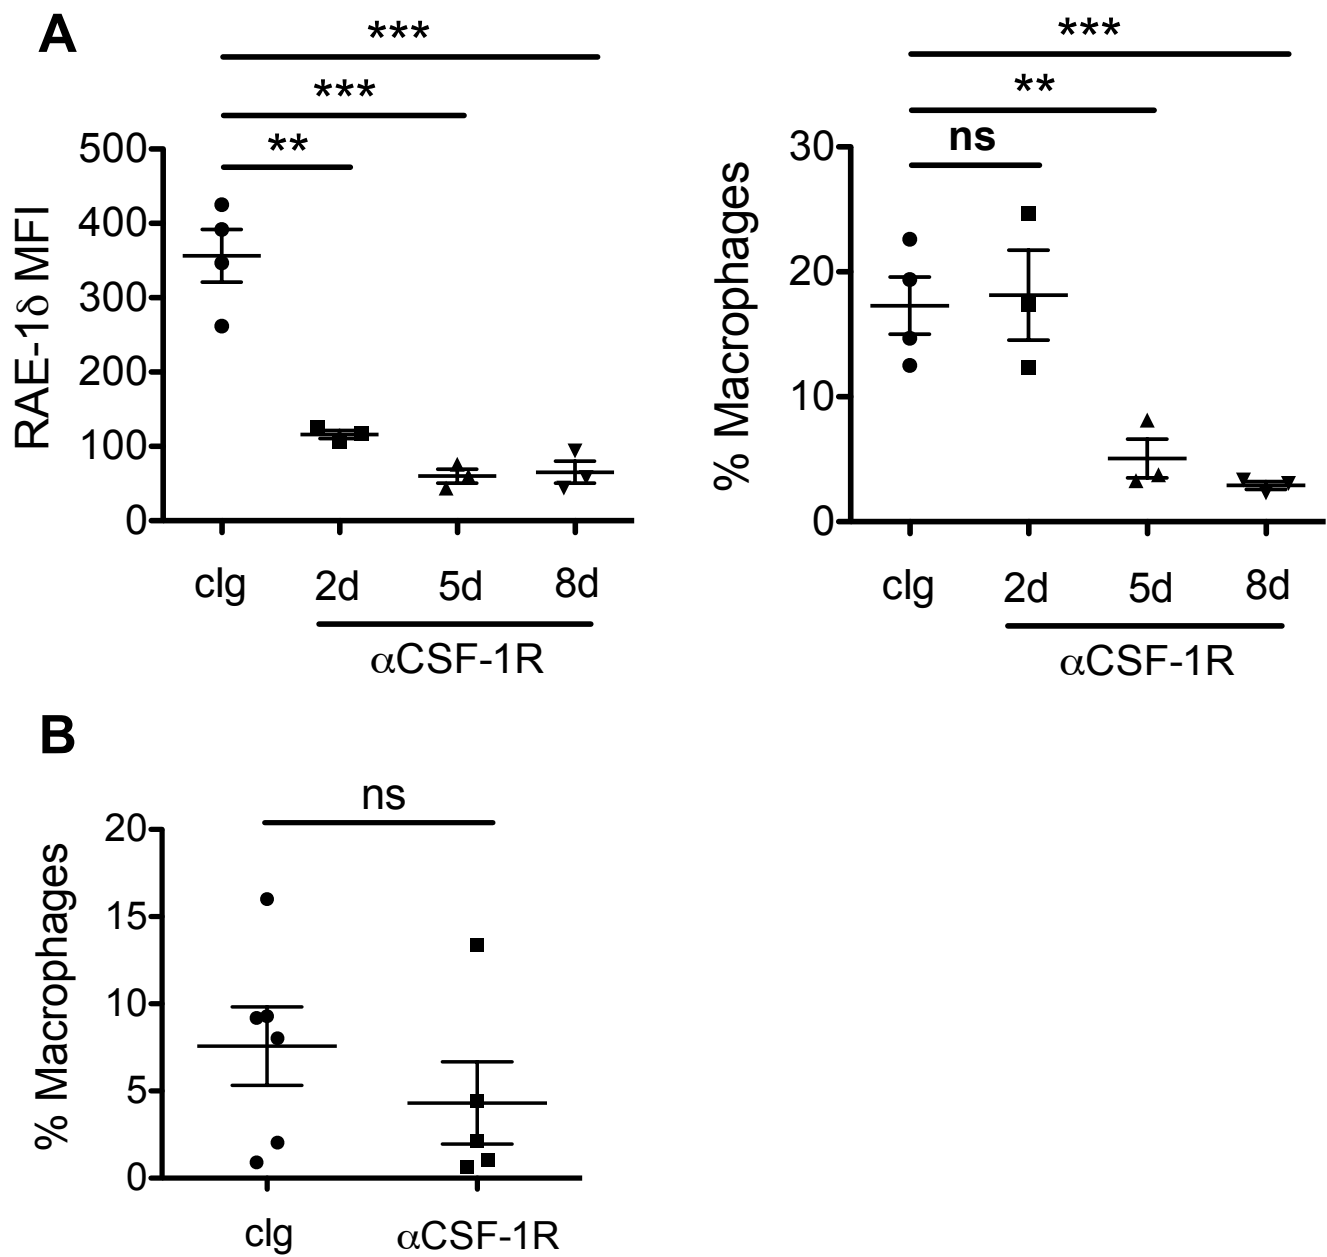

**Fig. 4 - Fig. Supplement 1**

Supplement: supp [file elife-32919-supp-v1.zip]

**A**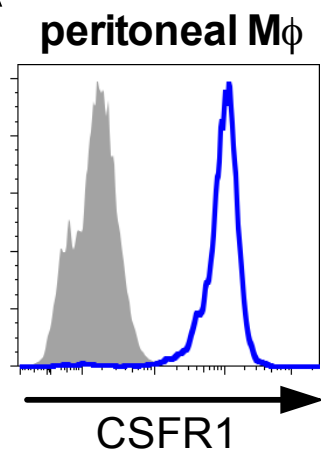**CSF-1****B**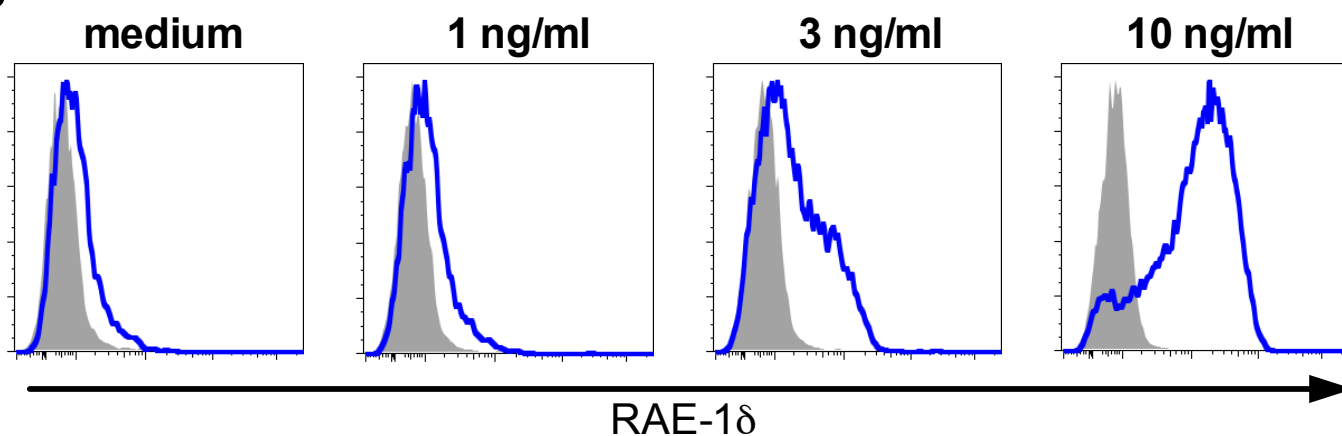**C**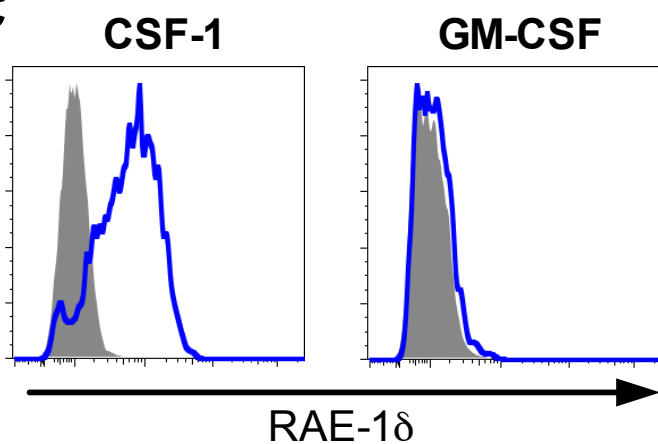

**Fig. 2 - Fig. Supplement 1**

Supplement: supp [file elife-32919-supp-v1.zip]

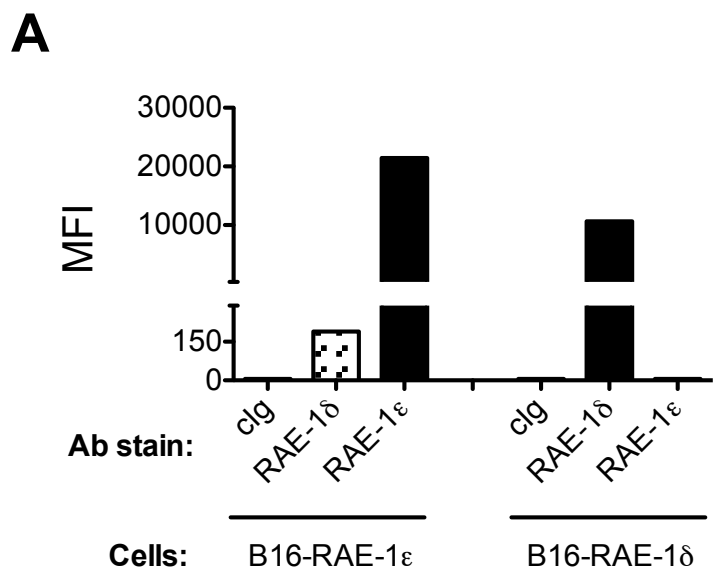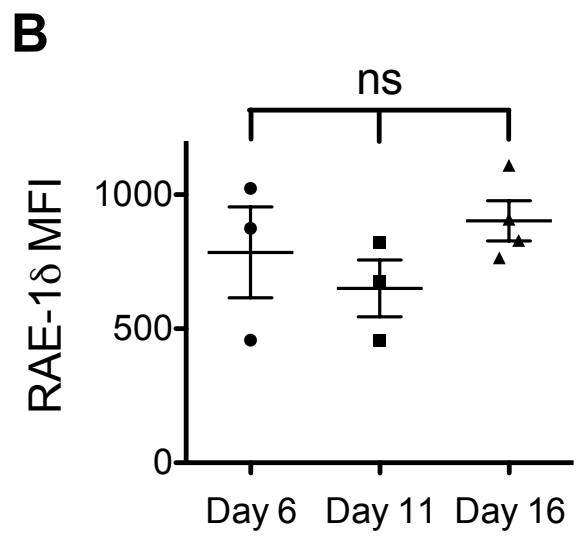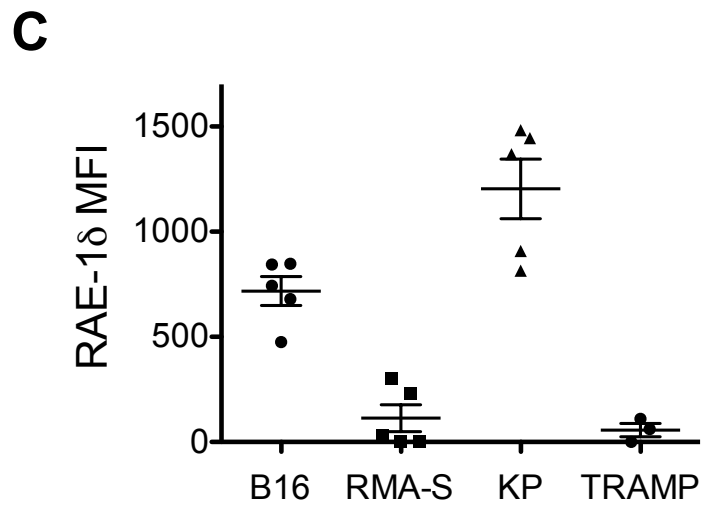

**Fig. 1 - Fig. Supplement 2**

Supplement: supp [file elife-32919-supp-v1.zip]

**A**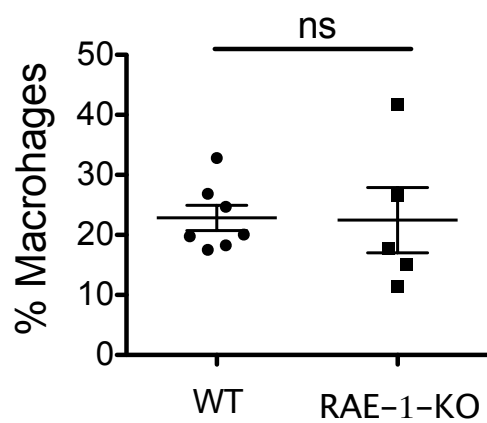**B**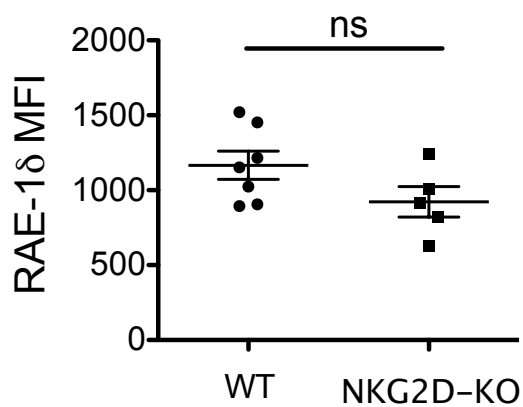

**Fig. 7 - Fig. Supplement 1**

Supplement: supp [file elife-32919-supp-v1.zip]

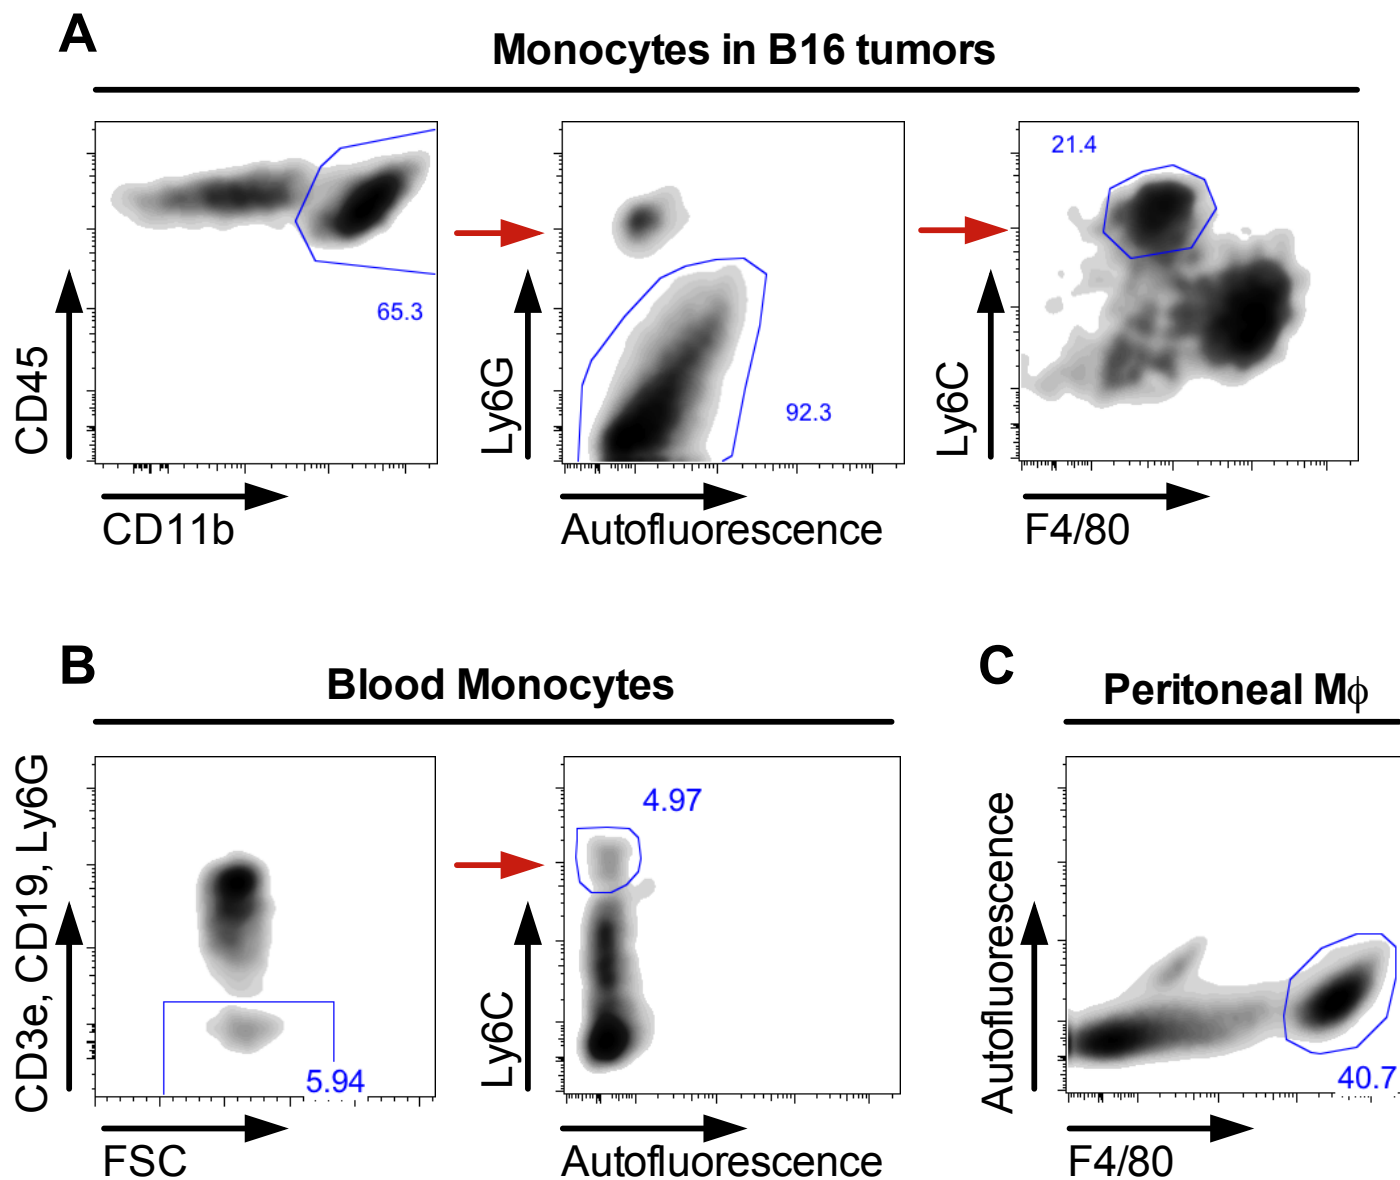

**Fig. 1 - Fig. Supplement 3**

Supplement: supp [file elife-32919-supp-v1.zip]

**A**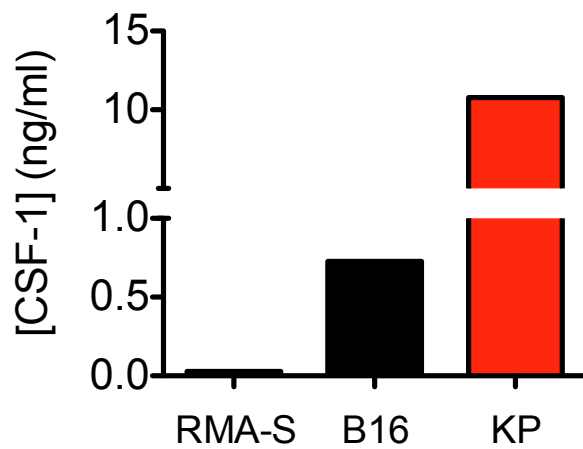**B**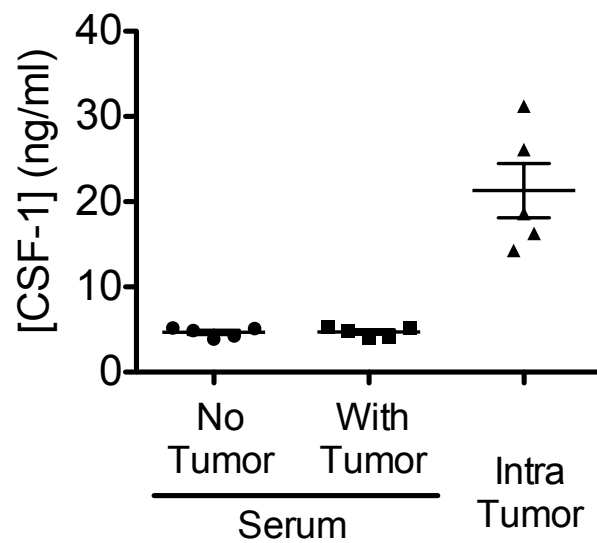**Fig. 3 - Fig. Supplement 1**

Supplement: supp [file elife-32919-supp-v1.zip]
